# Supplementary material for: Pearls before Swine: Plant-Derived Wastes to Produce Low-Cholesterol Meat from Farmed Pigs—A Bibliometric Analysis Combined to Meta-Analytic Studies
Source: MDPI journal article supplement (doi:10.3390/foods12030571), 2023-01-28
Supplement: s1 [file s1]

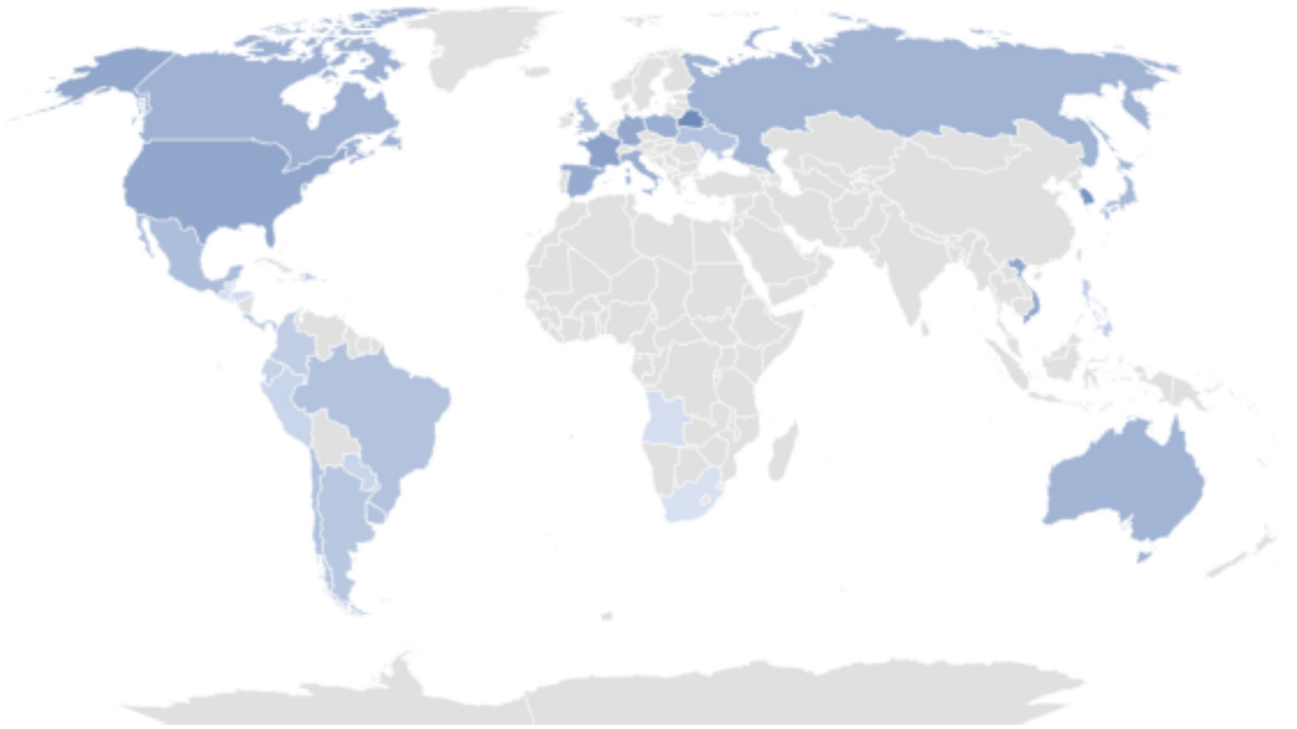

Figure S1. World pork consumption. Darker colors indicate countries with higher pork consumption. Data were obtained from Statistica website (<https://www.statista.com/>, accessed on 10 January 2023).
